# Supplementary material for: The Effect of Lycopene Preexposure on UV‐B‐Irradiated Human Keratinocytes
Source: Hindawi journal article supplement (doi:10.1155/2016/8214631), 2015-11-17
Supplement: f1 [file 8214631.f1.pdf]

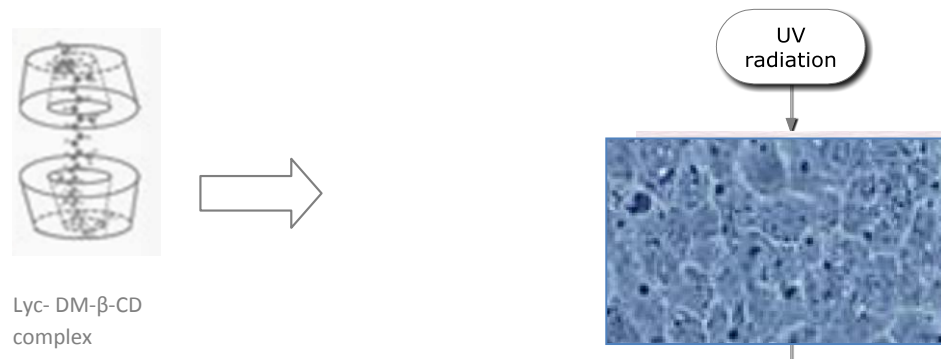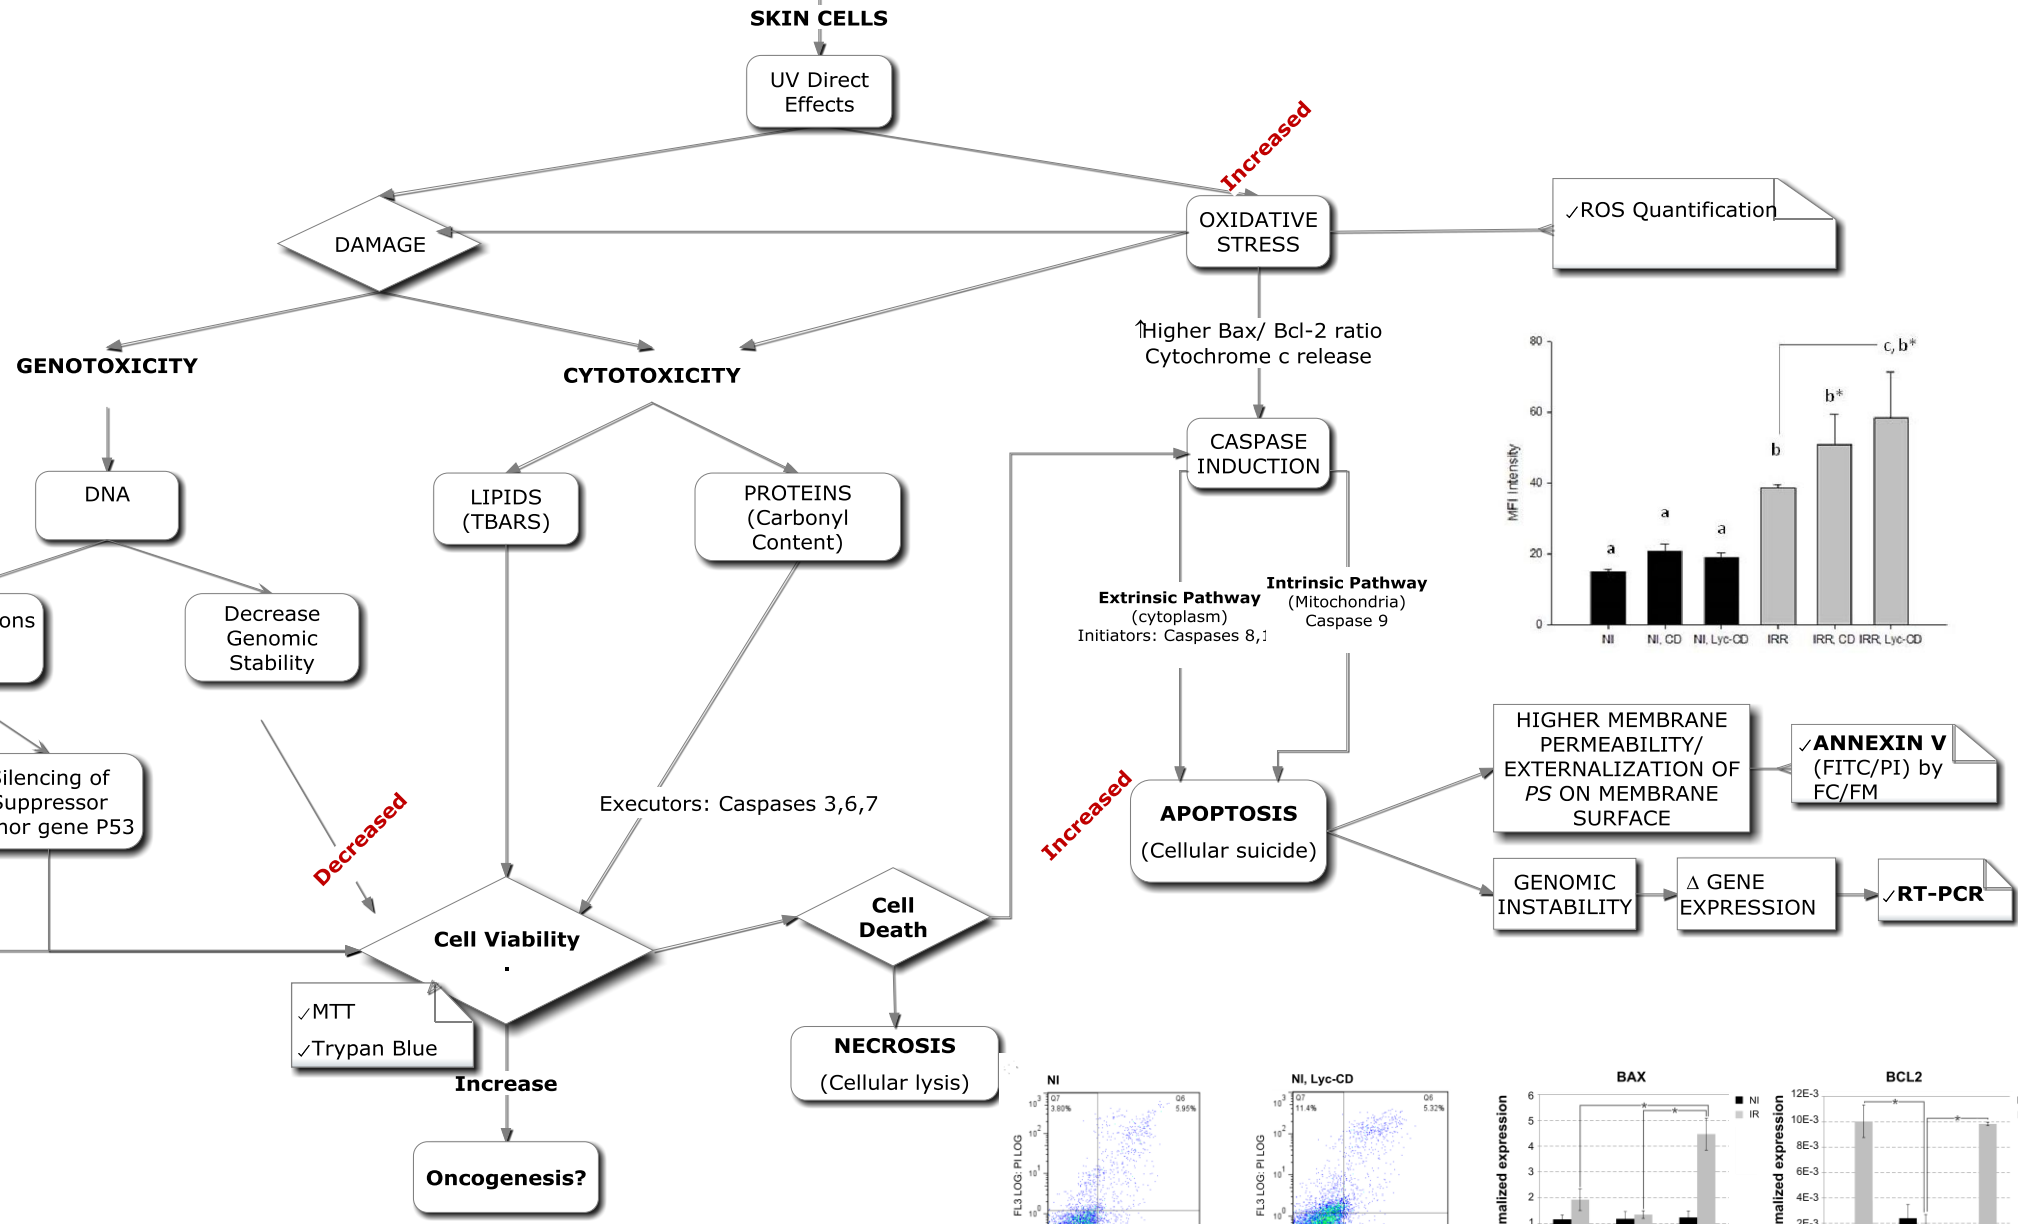

✓Gene Regulation by RT-PCR: higher Bax/ Bcl-2 ratio

✓Cell Cycle by FC/FM: G0/G1 phase arrest + peak subsub G1

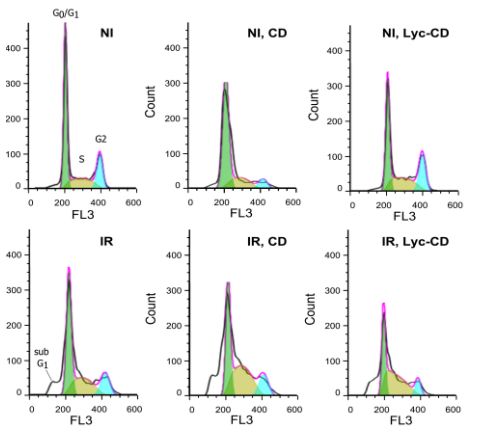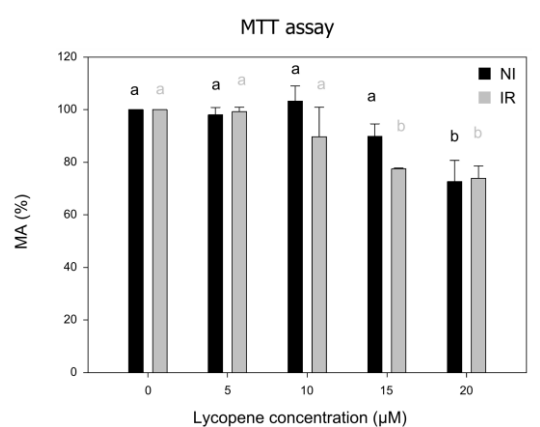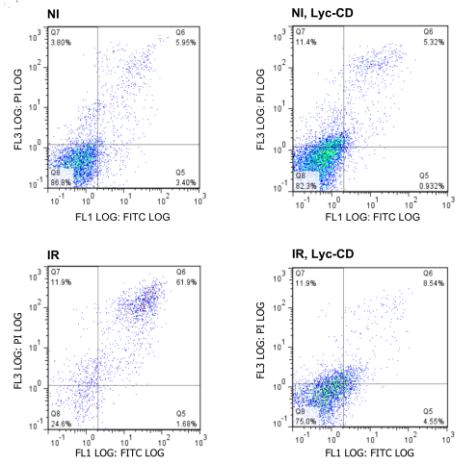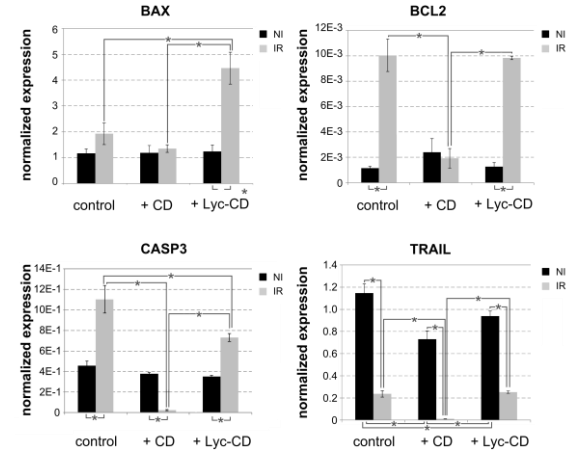

## Supplementary Material

### Vehicle for Lycopene

In another parallel work, THF/BHT diluted in FBS was also used to solubilize lycopene. Lin et al. (2007) demonstrated that FBS is likely responsible for the improved stability and cellular uptake of lycopene. In pilot experiments to screen for a suitable vehicle for lycopene, we observed that cells exposed to lycopene vehiculated in THF-BHT-FBS and irradiated also showed a decreased viability compared to non exposed irradiated cells (results not shown).

### Effect of UV-B doses on Cell Metabolic Activity by MTT Assay

According to preliminary MTT assays, it was observed that concentrations of Lyc-CD higher than 20  $\mu\text{M}$  induced a higher decrease in MA in irradiated cells. In these preliminary assays, exposure to the vehicle (CD) alone did not significantly alter the MA of non-irradiated cells.

### Apoptotic markers

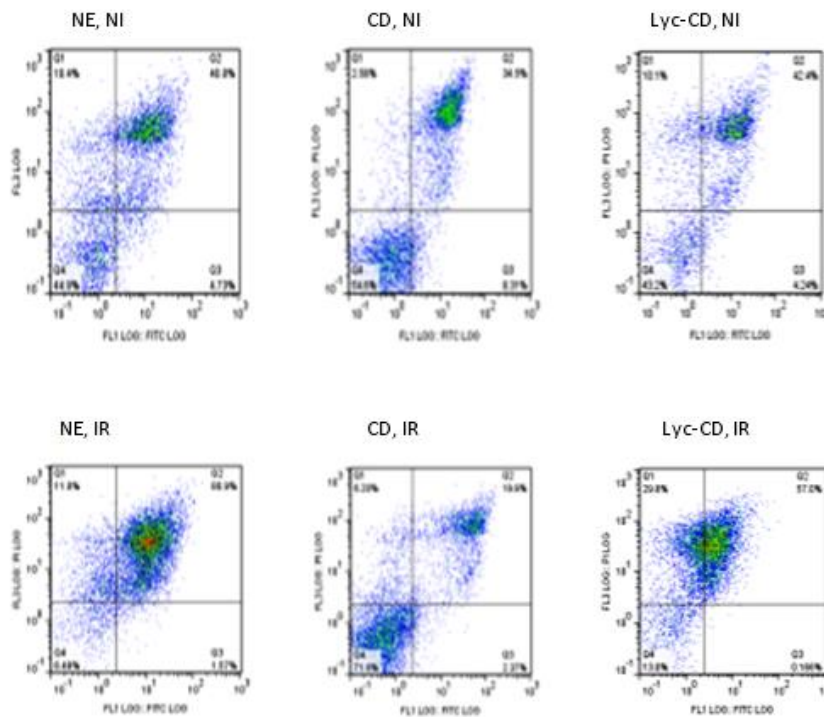

Representation of Annexin V-FITC Dot-Plots Gating (FL1 LOG vs FITC LOG) of UV-B (225  $\text{mJ}/\text{cm}^2$ ) irradiated (IR) and non irradiated (NI) HaCaT cells previously exposed to 10  $\mu\text{M}$  complexed lycopene (Lyc-CD) and only to the vehicle (CD) or non exposed (NE) correspondent to a complementary experiment.
